## ANNOUNCEMENTS

The American Board of Anesthesiology will administer its written examination for certification of CONTINUED DEMONSTRATION OF QUALIFICATIONS on Friday, May 5, 1995. Diplomates of the ABA who are interested in participating in the *voluntary* CDQ program may request an application by writing to the Secretary, American Board of Anesthesiology, 100 Constitution Plaza, Hartford, Connecticut 06103-1796. The deadline for receipt of completed applications in the Board office is November 15, 1994.

### Scientific Symposium of Neural Effects of General Anesthetics

The third Journal Sponsored Symposium for the Annual Meeting of the American Society of Anesthesiology is "Effect of General Anesthetics on Nervous Activity: Macroscopic Locations and Microscopic Mechanisms." As in the previous such Symposia, the goal is to integrate clinically tangible observations with results of laboratory investigations.

Beginning at 9:00 am on Tuesday, October 18, 1994, the Symposium commences with 1 hour to view the 15 posters especially selected for this broad area, continues with two lectures of 30 minutes each by Dr. Joan Kendig, Stanford University, and Dr. Ira Rampil, University of California, San Francisco, and follows with a 90-minute discussion of the inclusive subjects, directed and provoked by Dr. E. I. Eger II, University of California, San Francisco, and Dr. Neil Harrison, University of Chicago.

Past experience has shown these Symposia to be dynamic, interactive events. Audience participation is actively encouraged; there is no "panel of experts," and issues of interest and controversy are debated by the audience at large. I invite you to attend and participate in this year's Symposium. Your presence, interest, and involvement will contribute to its success.

**Gary Strichartz, Ph.D.**  
Symposium Organizer  
Member, Editorial Board
